# Supplementary material for: Towards understanding intermolecular interactions in hydantoin derivatives: the case of cycloalkane-5-spirohydantoins tethered with a halogenated benzyl moiety
Source: Royal Society of Chemistry journal article supplement (doi:10.1039/c6ce02210c), 2016-11-29
Supplement: c6ce02210c1.pdf [file c6ce02210c1.pdf]

## Electronic Supplementary Information

### **Towards understanding intermolecular interactions in hydantoin derivatives: case of cycloalkane-5-spirohydantoins tethered with a halogenated benzyl moiety**

Anita Lazić,<sup>a</sup> Nemanja Trišović,<sup>\*a</sup> Lidija Radovanović,<sup>b</sup> Jelena Rogan,<sup>a</sup> Dejan Poleti,<sup>a</sup>  
Željko Vitnik,<sup>c</sup> Vesna Vitnik,<sup>c</sup> Gordana Uščumlić<sup>a</sup>

<sup>a</sup>*Faculty of Technology and Metallurgy, University of Belgrade, Karnegijeva 4, 11000 Belgrade, Serbia. E-mail:  
ntrisovic@tmf.bg.ac.rs;*

<sup>b</sup>*Innovation Center, Faculty of Technology and Metallurgy, University of Belgrade, Karnegijeva 4, 11000 Belgrade,  
Serbia*

<sup>c</sup>*Department of Chemistry, ICTM, University of Belgrade, Studentski trg 12-16, 11000 Belgrade, Serbia*

**Table S1** Puckering parameters<sup>1</sup> of the investigated compounds

| Compound | $q_2$ , Å | $q_3$ , Å | $\varphi_2$ , ° | $\varphi_3$ , ° |          |
|----------|-----------|-----------|-----------------|-----------------|----------|
| 1        | 0.342(3)  |           | 184.8(6)        |                 |          |
| 2        | 0.343(4)  |           | 4.1(8)          |                 |          |
| 3        | 0.004(2)  | -0.562(2) | 296(30)         |                 |          |
| 4        | 0.004(5)  | -0.555(5) | 106(63)         |                 |          |
| 5        | A         | 0.290(4)  | 0.599(3)        | 131.4(8)        | 346.6(4) |
|          | B         | 0.504(3)  | 0.623(3)        | 272.0(3)        | 272.8(3) |
| 6        | A         | 0.498(4)  | 0.624(5)        | 271.9(5)        | 272.5(4) |
|          | B         | 0.274(6)  | 0.597(5)        | 234.1(12)       | 14.5(6)  |

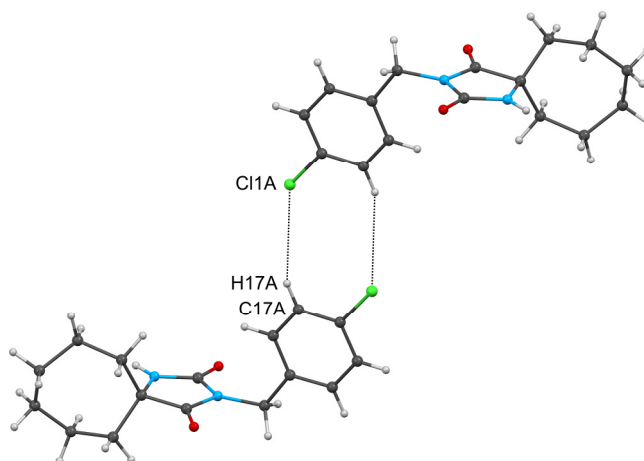

**Fig. S1** Dimeric moiety in the crystal structure of **5**.

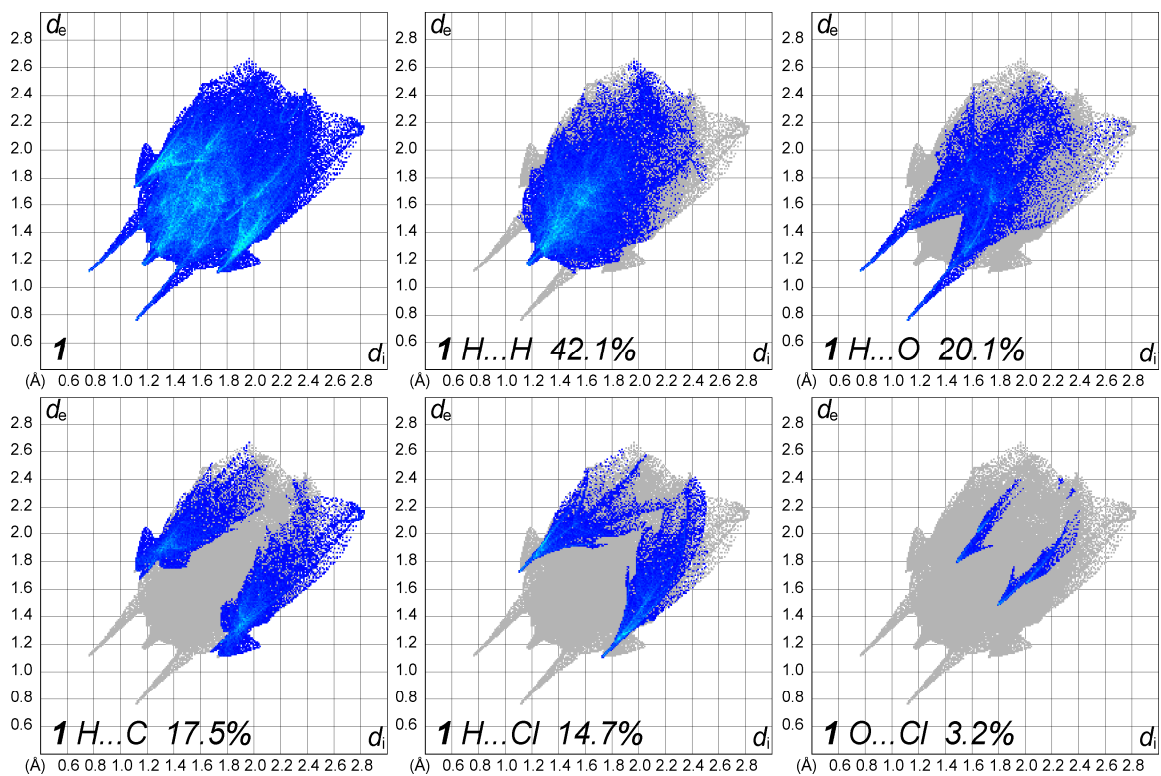

**Fig. S2** 2D fingerprint plots and decomposed 2D fingerprint plots of the observed atom–atom contacts for **1**.

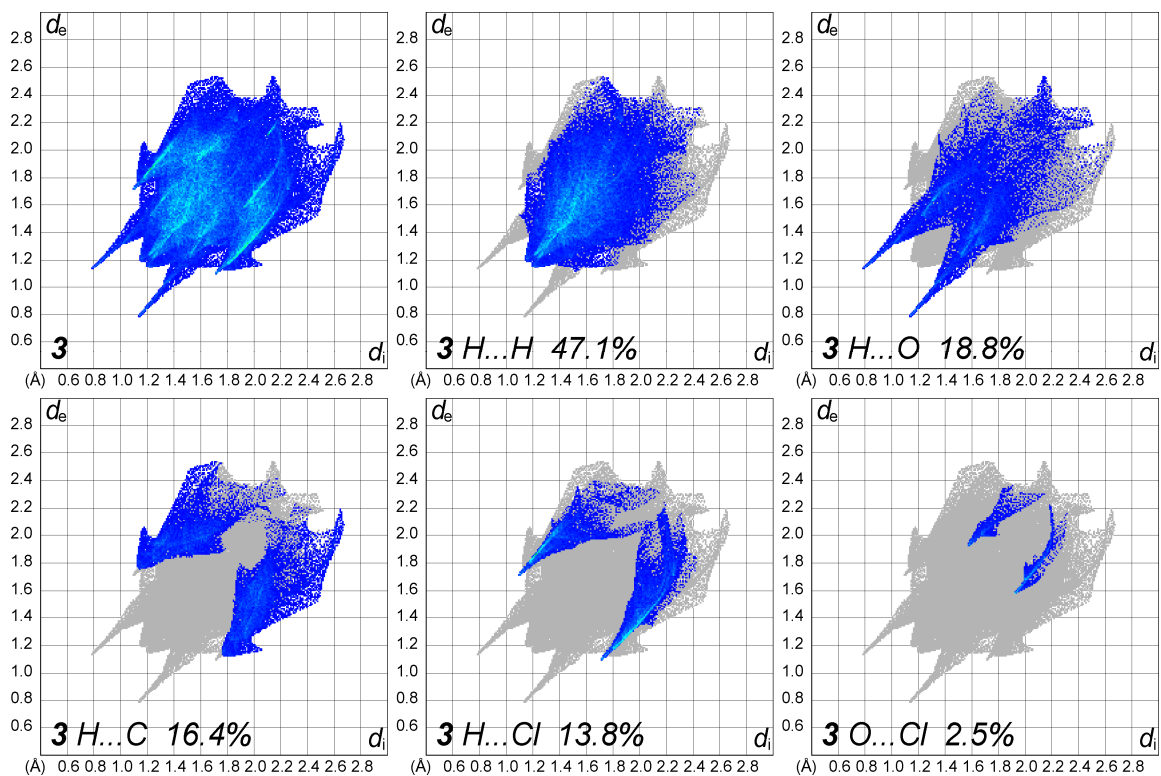

**Fig. S3** 2D fingerprint plots and decomposed 2D fingerprint plots of the observed atom–atom contacts for **3**.

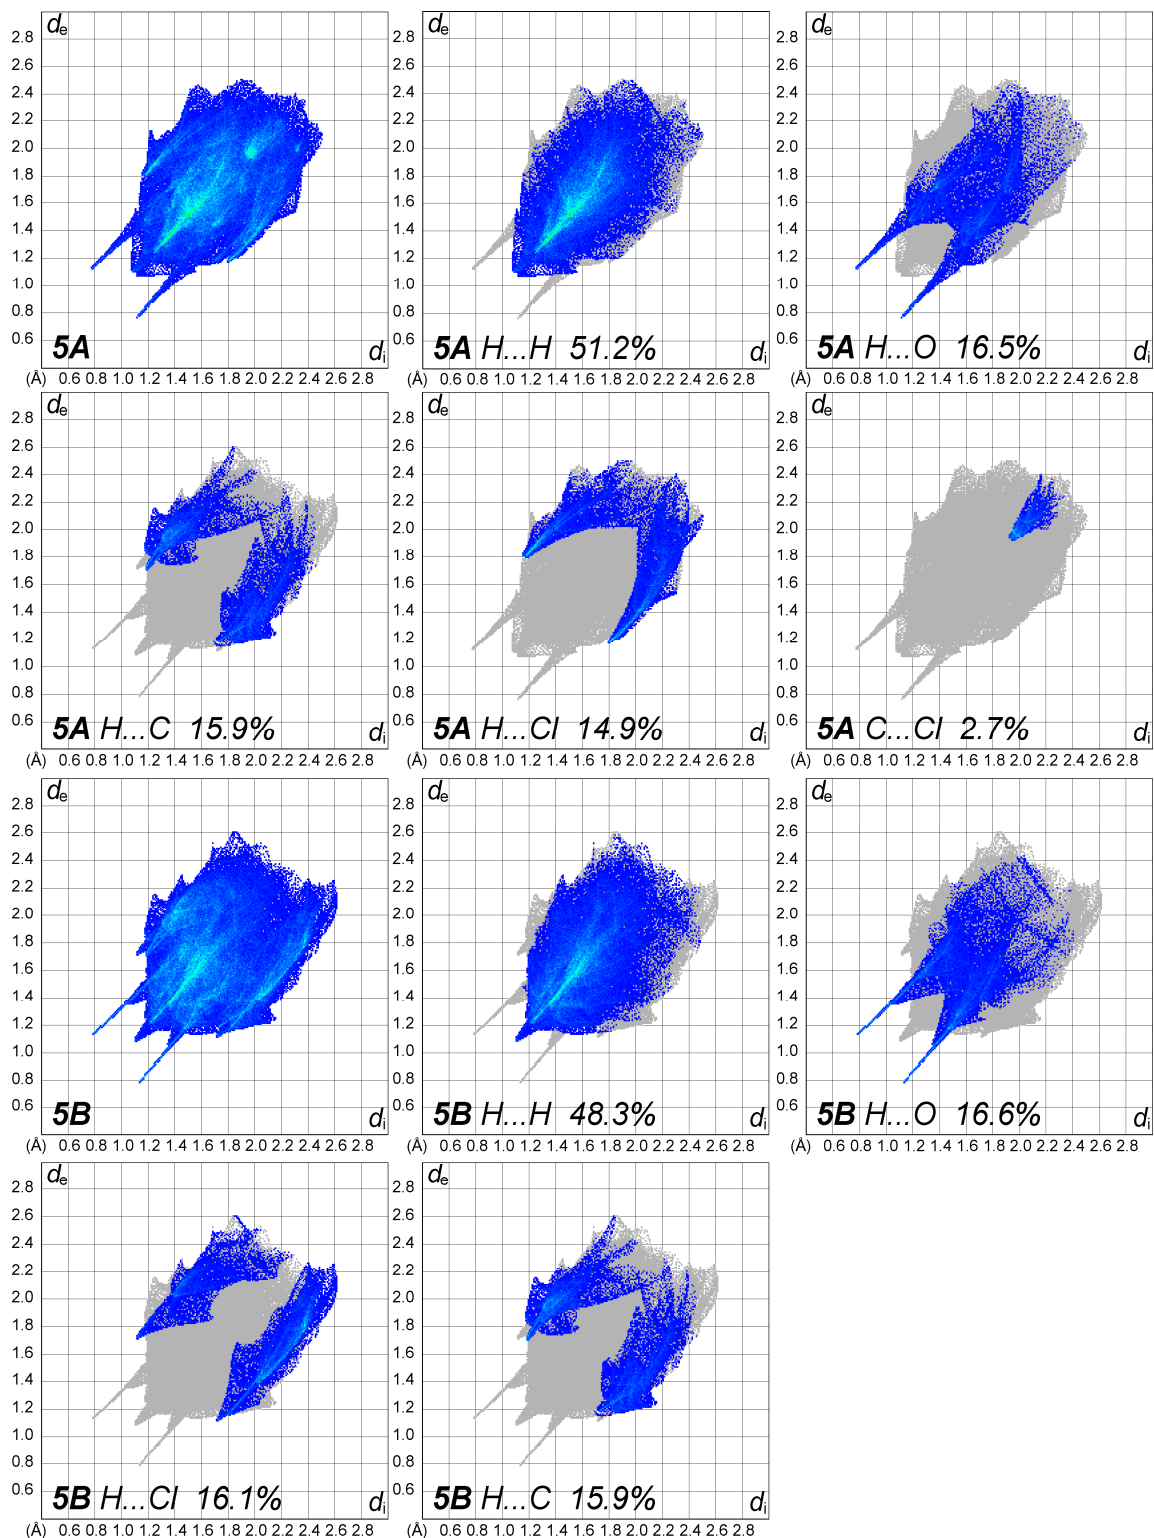

**Fig. S4** 2D fingerprint plots and decomposed 2D fingerprint plots of the observed atom–atom contacts for two molecules of **5**.

## Physico-chemical characterization of the investigated compounds

*3-[(4-Chlorophenyl)methyl]-1,3-diazaspiro[4.4]nonane-2,4-dione (1)*. yield: 62%. m.p. 128–131 °C. FTIR (KBr)  $\nu$  ( $\text{cm}^{-1}$ ): 3211 (NH), 1771 (C=O), 1711 (C=O).  $^1\text{H}$  NMR (200 MHz, DMSO- $d_6$ ):  $\delta$  = 8.61 (s, 1H, NH), 7.40 (d, 2H,  $J$  = 10 Hz,  $\text{C}_6\text{H}_4$ ), 7.26 (d, 2H,  $J$  = 10 Hz,  $\text{C}_6\text{H}_4$ ), 4.53 (s, 2H,  $\text{CH}_2$ ), 1.94–1.74 (m, 8H,  $\text{C}_5\text{H}_8$ ).  $^{13}\text{C}$  NMR (50 MHz, DMSO- $d_6$ ):  $\delta$  = 177.7, 155.6, 136.1, 132.3, 129.4, 128.8, 67.6, 40.6, 37.4, 24.8. Elemental analysis, found: C, 60.40; H, 5.45; N, 10.00. Calc. for  $\text{C}_{14}\text{H}_{15}\text{N}_2\text{O}_2\text{Cl}$ : C, 60.33; H, 5.42; N, 10.05%.

*3-[(4-Bromophenyl)methyl]-1,3-diazaspiro[4.4]nonane-2,4-dione (2)*. yield: 68%. m.p. 162–165 °C. FTIR (KBr)  $\nu$  ( $\text{cm}^{-1}$ ): 3216 (NH), 1768 (C=O), 1709 (C=O).  $^1\text{H}$  NMR (200 MHz, DMSO- $d_6$ ):  $\delta$  = 8.61 (s, 1H, NH), 7.54 (d, 2H,  $J$  = 8 Hz,  $\text{C}_6\text{H}_4$ ), 7.20 (d, 2H,  $J$  = 8 Hz,  $\text{C}_6\text{H}_4$ ), 4.51 (s, 2H,  $\text{CH}_2$ ), 1.95–1.75 (m, 8H,  $\text{C}_5\text{H}_8$ ).  $^{13}\text{C}$  NMR (50 MHz, DMSO- $d_6$ ):  $\delta$  = 177.6, 155.6, 136.6, 131.7, 129.8, 120.7, 67.6, 40.7, 37.4, 24.8. Elemental analysis, found: C, 52.10; H, 4.70; N, 8.70. Calc. for  $\text{C}_{14}\text{H}_{15}\text{N}_2\text{O}_2\text{Br}$ : C, 52.03; H, 4.68; N, 8.67%.

*3-[(4-Chlorophenyl)methyl]-1,3-diazaspiro[4.5]decane-2,4-dione (3)*. yield: 66%. m.p. 185–186 °C. FTIR (KBr)  $\nu$  ( $\text{cm}^{-1}$ ): 3232 (NH), 1773 (C=O), 1710 (C=O).  $^1\text{H}$  NMR (200 MHz, DMSO- $d_6$ ):  $\delta$  = 8.83 (s, 1H, NH), 7.40 (d, 2H,  $J$  = 8 Hz,  $\text{C}_6\text{H}_4$ ), 7.24 (d, 2H,  $J$  = 8 Hz,  $\text{C}_6\text{H}_4$ ), 4.52 (s, 2H,  $\text{CH}_2$ ), 1.68–1.03 (m, 10H,  $\text{C}_6\text{H}_{10}$ ).  $^{13}\text{C}$  NMR (50 MHz, DMSO- $d_6$ ):  $\delta$  = 176.8, 155.7, 136.1, 132.2, 129.3, 128.8, 61.3, 40.4, 33.5, 24.3, 21.0. Elemental analysis, found: C, 61.57; H, 5.89; N, 9.52. Calc. for  $\text{C}_{15}\text{H}_{17}\text{N}_2\text{O}_2\text{Cl}$ : C, 61.54; H, 5.85; N, 9.57%.

*3-[(4-Bromophenyl)methyl]-1,3-diazaspiro[4.5]decane-2,4-dione (4)*. yield: 70%. m.p. 193–194 °C. FTIR (KBr)  $\nu$  ( $\text{cm}^{-1}$ ): 3216 (NH), 1768 (C=O), 1709 (C=O).  $^1\text{H}$  NMR (200 MHz, DMSO- $d_6$ ):  $\delta$  = 8.83 (s, 1H, NH), 7.53 (d, 2H,  $J$  = 8 Hz,  $\text{C}_6\text{H}_4$ ), 7.18 (d, 2H,  $J$  = 8 Hz,  $\text{C}_6\text{H}_4$ ), 4.50 (s, 2H,  $\text{CH}_2$ ), 1.67–1.03 (m, 8H,  $\text{C}_6\text{H}_{10}$ ).  $^{13}\text{C}$  NMR (50 MHz, DMSO- $d_6$ ):  $\delta$  = 176.8, 155.7, 136.6, 131.7, 129.6, 120.7, 61.3, 40.5, 33.5, 24.5, 21.0. Elemental analysis, found: C, 53.48; H, 5.02; N, 8.35. Calc. for  $\text{C}_{15}\text{H}_{17}\text{N}_2\text{O}_2\text{Br}$ : C, 53.43; H, 5.08; N, 8.31%.

*3-[(4-Chlorophenyl)methyl]-1,3-diazaspiro[4.6]undecane-2,4-dione (5)*. yield: 65%. m.p. 170–173 °C. FTIR (KBr)  $\nu$  ( $\text{cm}^{-1}$ ): 3231 (NH), 1769 (C=O), 1721 (C=O).  $^1\text{H}$  NMR (200 MHz, DMSO- $d_6$ ):  $\delta$  = 8.68 (s, 1H, NH), 7.39 (d, 2H,  $J$  = 8.4 Hz,  $\text{C}_6\text{H}_4$ ), 7.23 (d, 2H,  $J$  = 8.6 Hz,  $\text{C}_6\text{H}_4$ ), 4.49 (s, 2H,  $\text{CH}_2$ ), 1.85–1.55 (m, 12H,  $\text{C}_7\text{H}_{12}$ ).  $^{13}\text{C}$  NMR (50 MHz, DMSO- $d_6$ ):  $\delta$  = 178.0, 155.6, 136.2, 132.2, 129.3, 128.8, 63.9, 40.4, 37.1, 28.9, 22.3. Elemental analysis, found: C, 62.59; H, 6.27; N, 9.10. Calc. for  $\text{C}_{16}\text{H}_{19}\text{N}_2\text{O}_2\text{Cl}$ : C, 62.64; H, 6.24; N, 9.13%.

3-[(4-Bromophenyl)methyl]-1,3-diazaspiro[4.6]undecane-2,4-dione (**6**). yield: 67%. m.p. 178–180 °C. FTIR (KBr)  $\nu$  ( $\text{cm}^{-1}$ ): 3232 (NH), 1770 (C=O), 1720 (C=O).  $^1\text{H}$  NMR (200 MHz, DMSO- $d_6$ ):  $\delta$  = 8.68 (s, 1H, NH), 7.52 (d, 2H,  $J$  = 8.4 Hz,  $\text{C}_6\text{H}_4$ ), 7.17 (d, 2H,  $J$  = 8.4 Hz,  $\text{C}_6\text{H}_4$ ), 4.47 (s, 2H,  $\text{CH}_2$ ), 1.85–1.55 (m, 12H,  $\text{C}_7\text{H}_{12}$ ).  $^{13}\text{C}$  NMR (50 MHz, DMSO- $d_6$ ):  $\delta$  = 178.0, 155.6, 136.6, 131.7, 129.7, 120.7, 63.9, 40.5, 37.1, 28.9, 22.3. Elemental analysis, found: C, 54.68; H, 5.48; N, 8.03. Calc. for  $\text{C}_{16}\text{H}_{19}\text{N}_2\text{O}_2\text{Br}$ : C, 54.71; H, 5.45; N, 7.98 %.

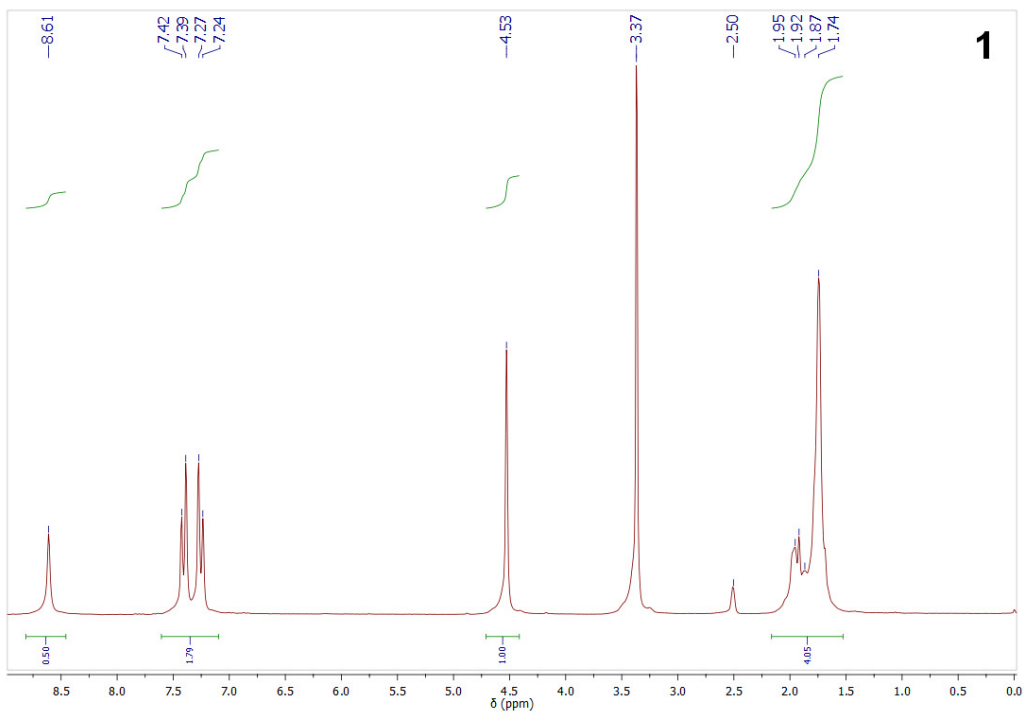

**Fig. S5**  $^1\text{H}$  NMR spectrum of 3-[(4-chlorophenyl)methyl]-1,3-diazaspiro[4.4]nonane-2,4-dione.

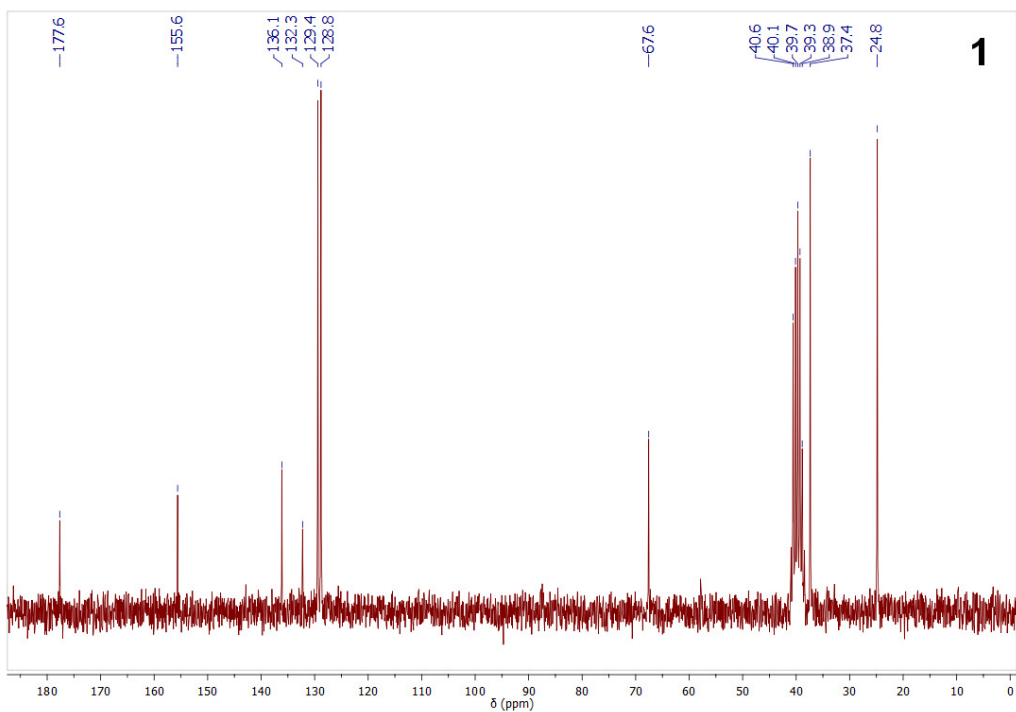

**Fig. S6**  $^{13}\text{C}$  NMR spectrum of 3-[(4-chlorophenyl)methyl]-1,3-diazaspiro[4.4]nonane-2,4-dione.



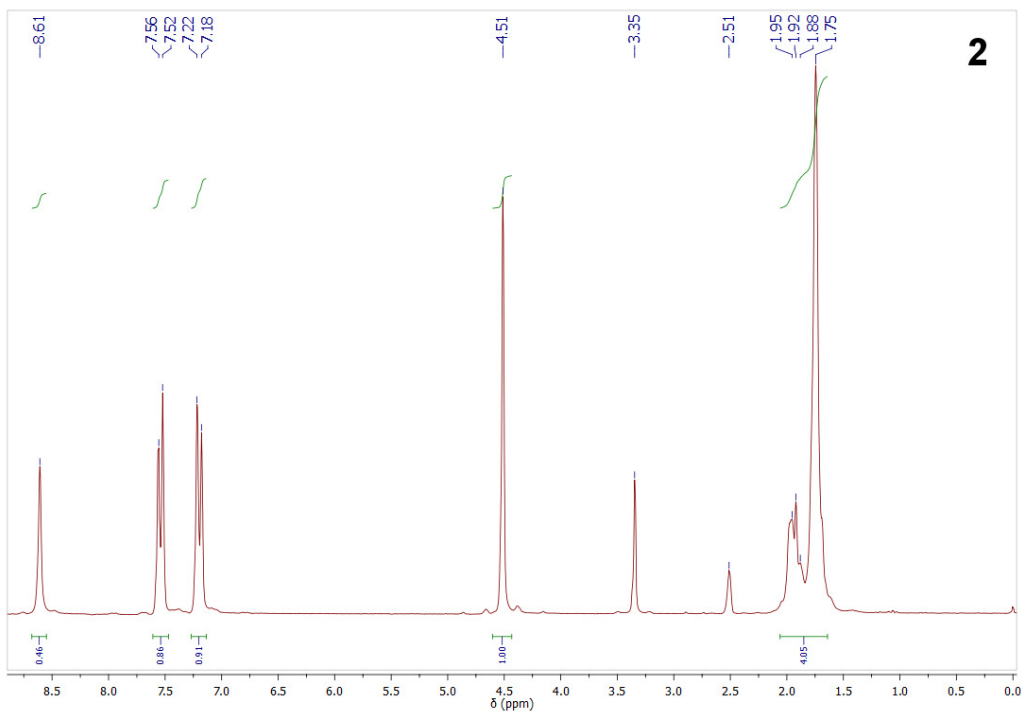

**Fig. S7**  $^1\text{H}$  NMR spectrum of 3-[(4-bromophenyl)methyl]-1,3-diazaspiro[4.4]nonane-2,4-dione.

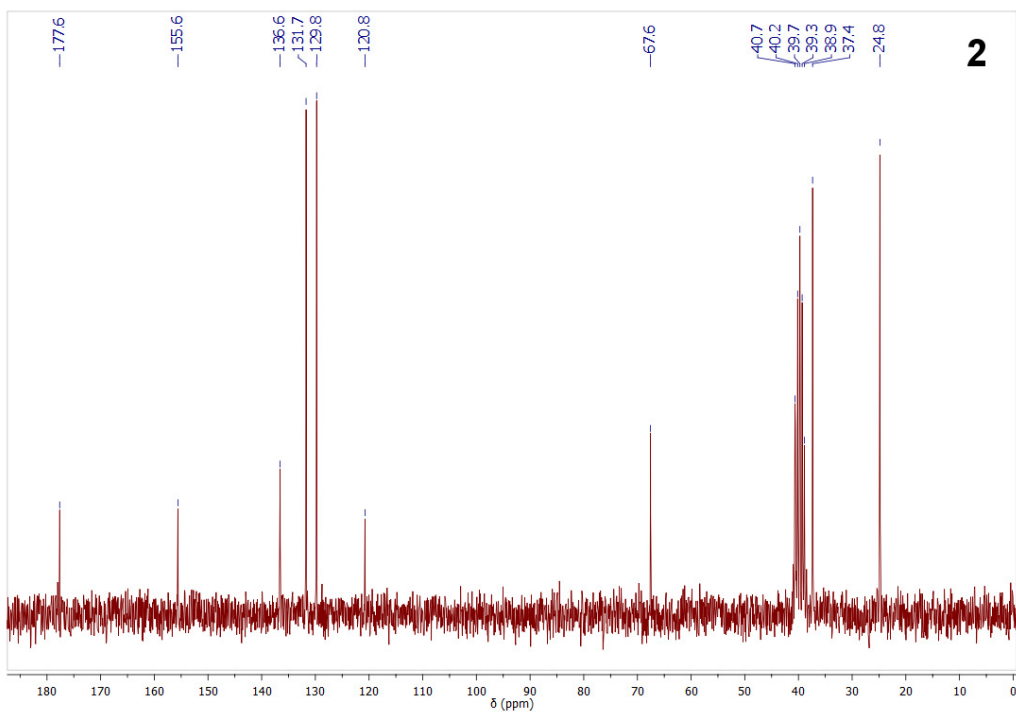

**Fig. S8**  $^{13}\text{C}$  NMR spectrum of 3-[(4-bromophenyl)methyl]-1,3-diazaspiro[4.4]nonane-2,4-dione.

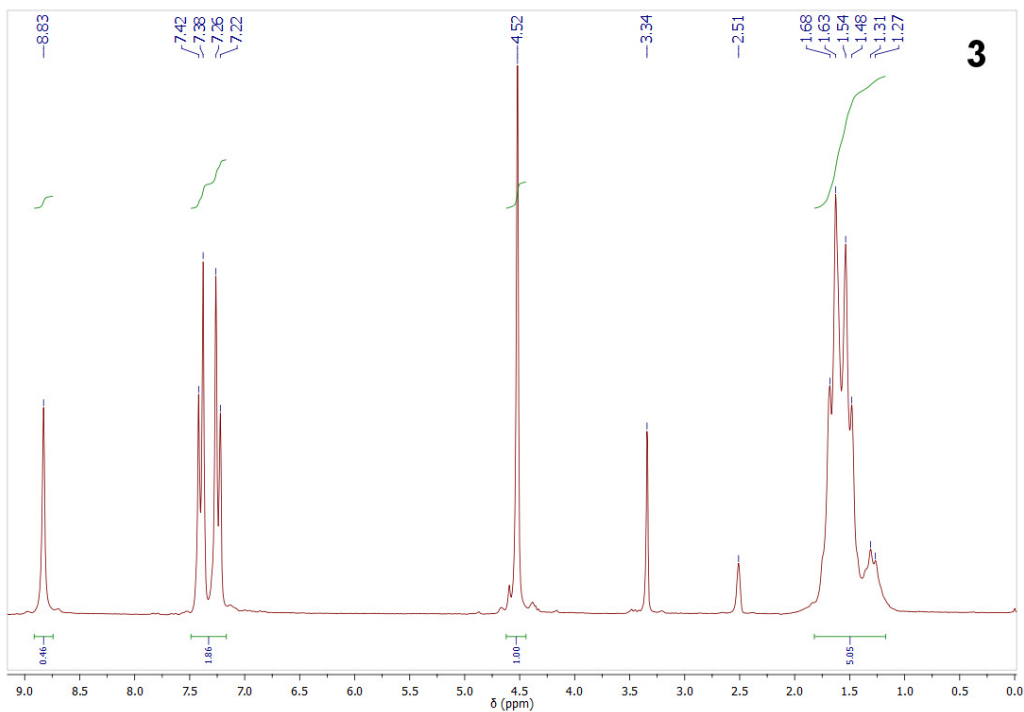

**Fig. S9**  $^1\text{H}$  NMR spectrum of 3-[(4-chlorophenyl)methyl]-1,3-diazaspiro[4.5]decane-2,4-dione.

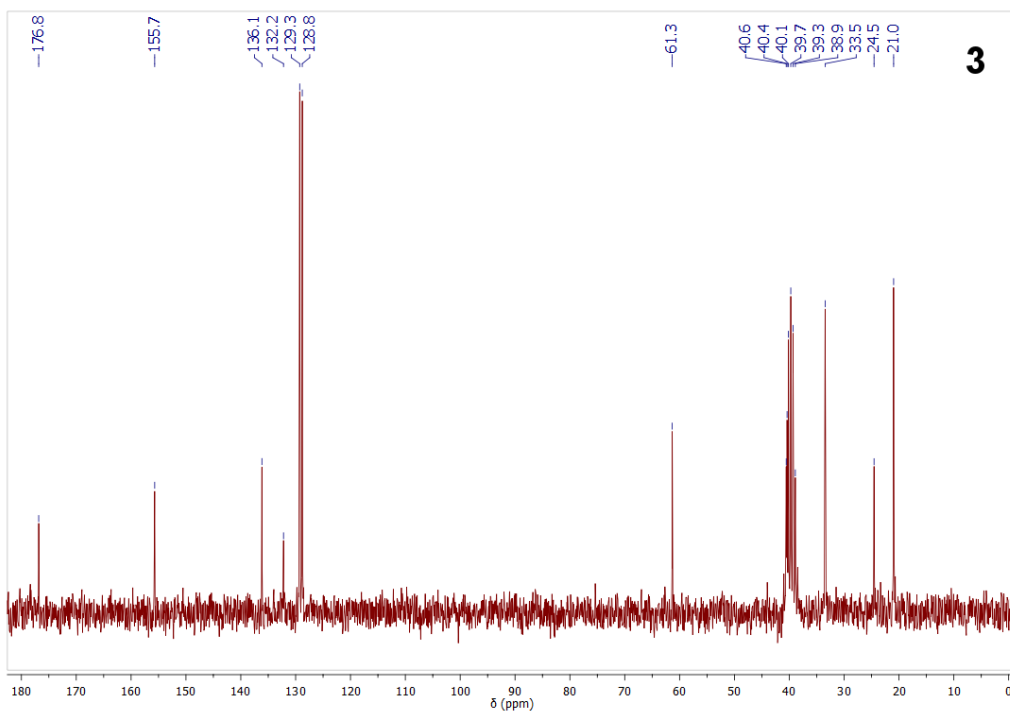

**Fig. S10**  $^{13}\text{C}$  NMR spectrum of 3-[(4-chlorophenyl)methyl]-1,3-diazaspiro[4.5]decane-2,4-dione.

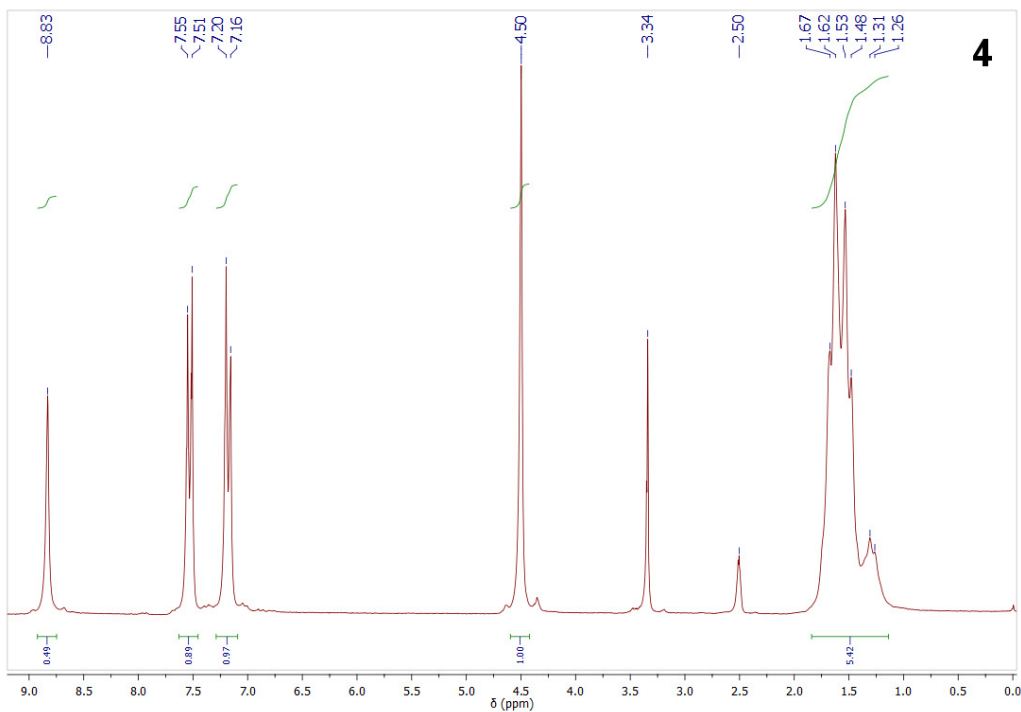

**Fig. S11**  $^1\text{H}$  NMR spectrum of 3-[(4-bromophenyl)methyl]-1,3-diazaspiro[4.5]decane-2,4-dione.

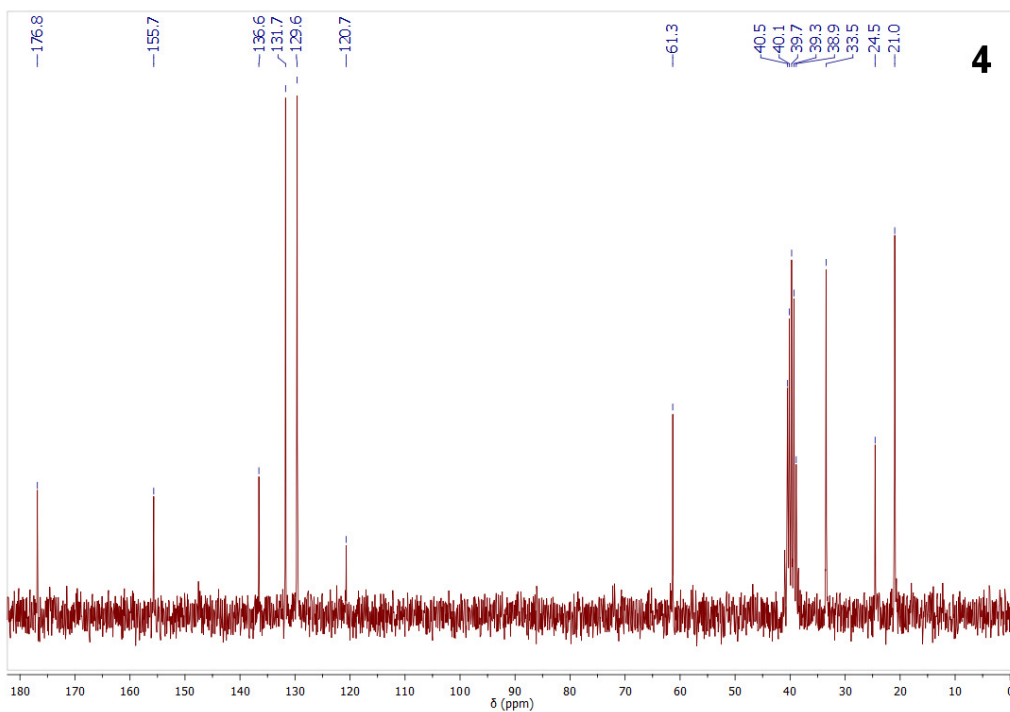

**Fig. S12**  $^{13}\text{C}$  NMR spectrum of 3-[(4-bromophenyl)methyl]-1,3-diazaspiro[4.5]decane-2,4-dione.

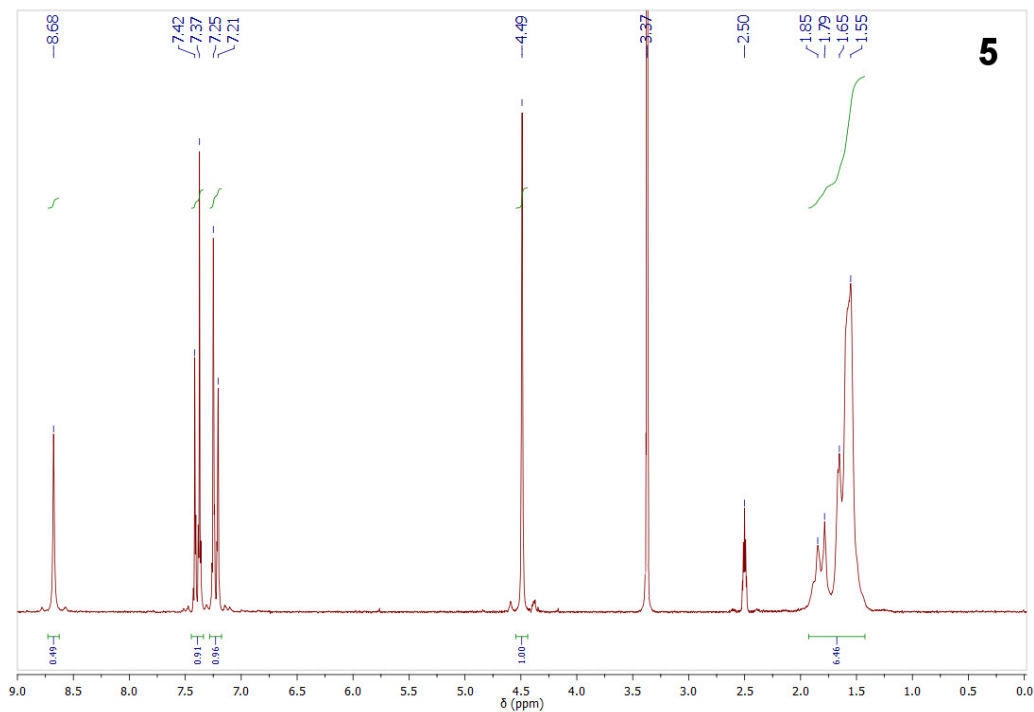

**Fig. S13**  $^1\text{H}$  NMR spectrum of 3-[(4-chlorophenyl)methyl]-1,3-diazaspiro[4.6]undecane-2,4-dione.

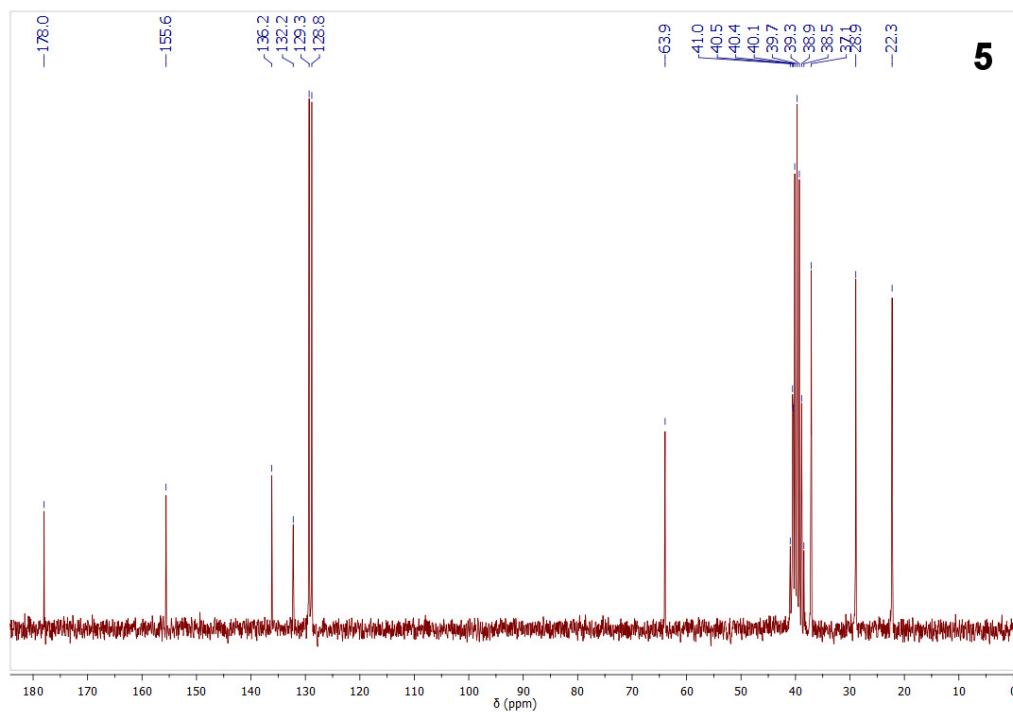

**Fig. S14**  $^{13}\text{C}$  NMR spectrum of 3-[(4-chlorophenyl)methyl]-1,3-diazaspiro[4.6]undecane-2,4-dione.

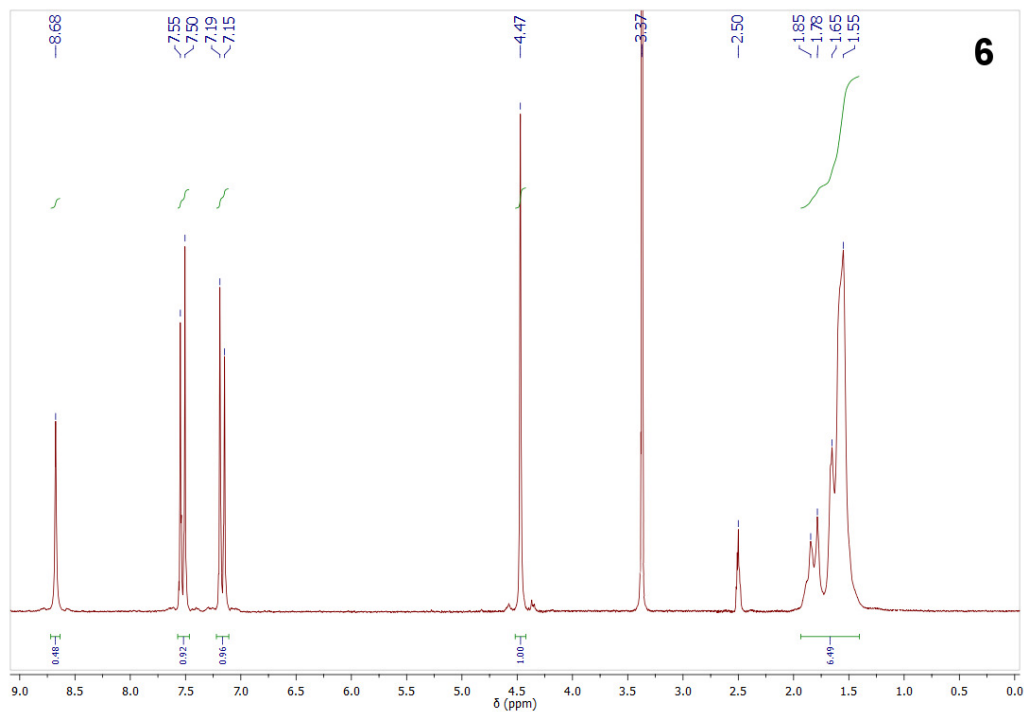

**Fig. S15**  $^1\text{H}$  NMR spectrum of 3-[(4-bromophenyl)methyl]-1,3-diazaspiro[4.6]undecane-2,4-dione.

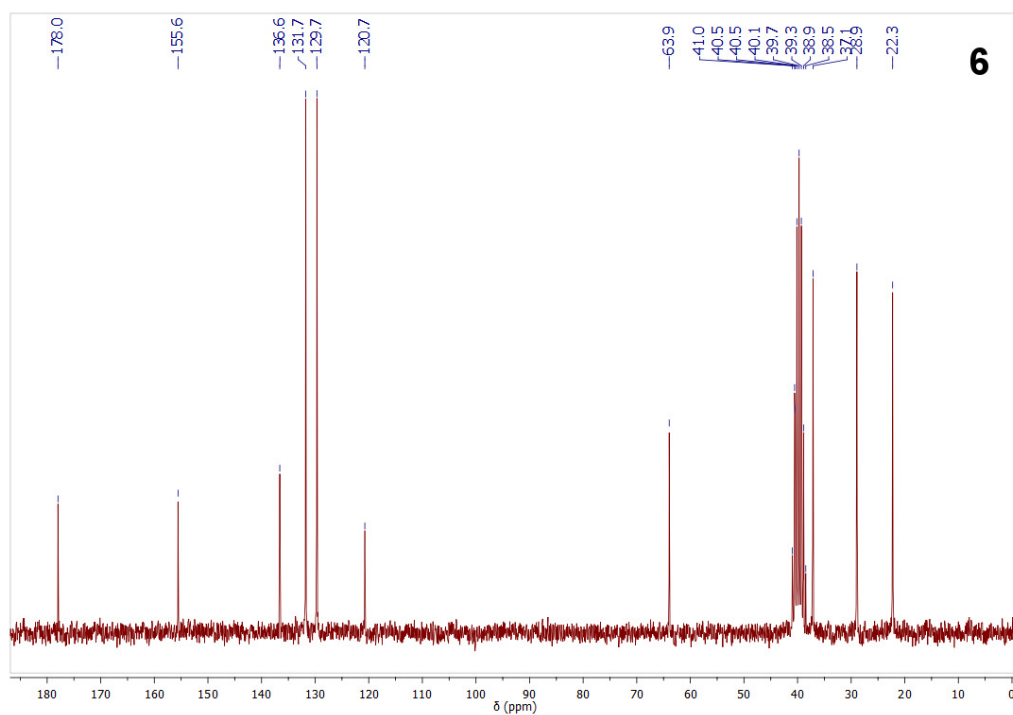

**Fig. S16**  $^{13}\text{C}$  NMR spectrum of 3-[(4-bromophenyl)methyl]-1,3-diazaspiro[4.6]undecane-2,4-dione.

## References

- 1 J. B. Hendrickson, *J. Am. Chem. Soc.*, 1967, **89**, 7036.
